# Supplementary material
Source: Springer Nature journal article supplement (https://www.springermedizin.de/resource/supplementary/12970_2007_47_MOESM2_ESM.pdf/9594242)
Supplement: MOESM2 [file 9594242]

| <b>Highest Level of Education Obtained to Date</b> | <b>AAS Respondents</b> | <b>*US Census</b> | <b>Percent Difference between AAS Users and US Census</b> |
|----------------------------------------------------|------------------------|-------------------|-----------------------------------------------------------|
| <b>Did not graduate high school</b>                | 0.9% (n=17)            | 16.3%             | -15.4%                                                    |
| <b>GED</b>                                         | 2% (n=39)              | x                 | x                                                         |
| <b>High school diploma</b>                         | 23% (n=448)            | 31.1%             | -8.1%                                                     |
| <b>Vocational school</b>                           | 5.1% (n=100)           | 3.6%              | 1.5%                                                      |
| <b>Bachelor degree</b>                             | 33.2% (n=647)          | 15.6%             | 17.6%                                                     |
| <b>Master degree</b>                               | 7.6% (n=149)           | 5.5%              | 2.1%                                                      |
| <b>Professional degree (e.g., MD, JD)</b>          | 3.7% (n=72)            | 1.4%              | 2.3%                                                      |
| <b>Doctorate</b>                                   | 1.5% (n=30)            | 1.0%              | 0.5%                                                      |

\*U.S. Census Bureau [<http://www.census.gov/prod/2005pubs/p70-98.pdf>]

\*\*U.S. Census Bureau statistics from 2001 for American's 18 years and older; includes females

\*\*\*Several respondents are current college students which would change the number of those with a high school diploma to 18.92% (n=369).

\*\*\*\*X= Data not available
